# Supplementary material for: Efficient hole transfer from monolayer WS2 to ultrathin amorphous black phosphorus
Source: Royal Society of Chemistry journal article supplement (doi:10.1039/c8nh00234g), 2018-10-02
Supplement: c8nh00234g1.pdf [file c8nh00234g1.pdf]

## Electronic Supplementary Information

### Efficient Hole Transfer from Monolayer WS<sub>2</sub> to Ultrathin Amorphous Black Phosphorus

Matthew Z. Bellus,<sup>a</sup> Zhibin Yang,<sup>b</sup> Peymon Zereshki,<sup>a</sup> Jianhua Hao,<sup>b</sup> Shu Ping Lau,<sup>b</sup> and  
Hui Zhao<sup>\*a</sup>

<sup>a</sup>*Department of Physics and Astronomy, The University of Kansas, Lawrence, Kansas 66045, USA*

<sup>b</sup>*Department of Applied Physics, The Hong Kong Polytechnic University, Hung Hom Kowloon, Hong Kong,  
People's Republic of China*

## Power Dependence

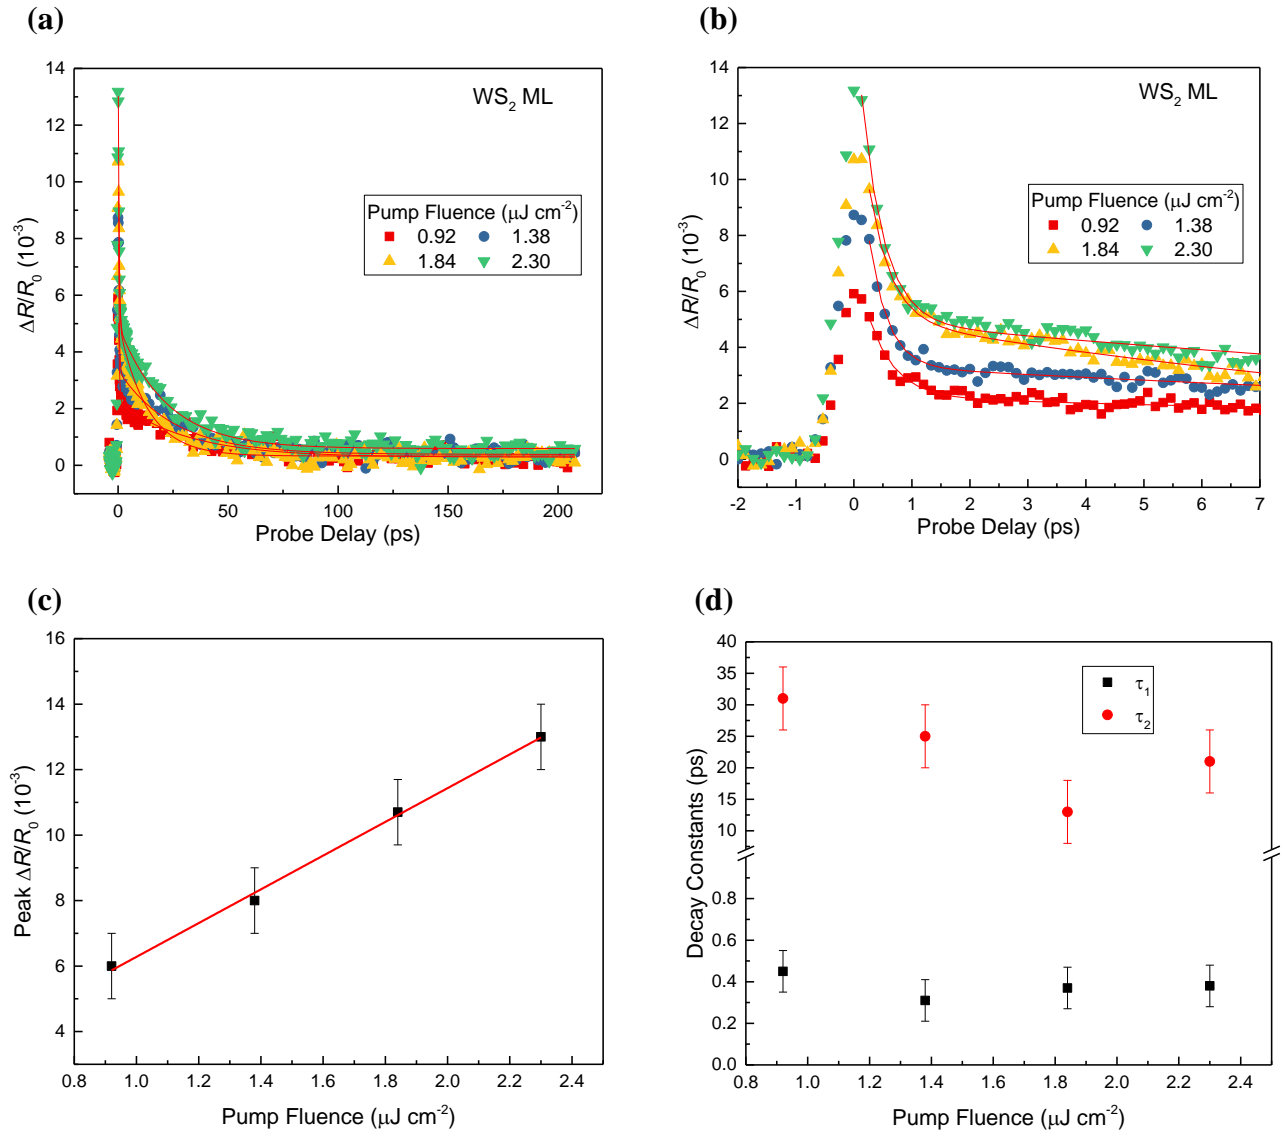

**Figure S1.** (a) Differential reflection signal of the WS<sub>2</sub> ML sample with different values of pump fluence as indicated in the legend. The red curves are double-exponential fits (see main text). (b) Same as (a) but with a smaller time range near zero probe delay. (c) Dependence of the peak signal on the pump fluence. The red line is a linear fit to the data. (d) The two time constants deduced from fits shown in (a) and (b) as a function of the pump fluence.

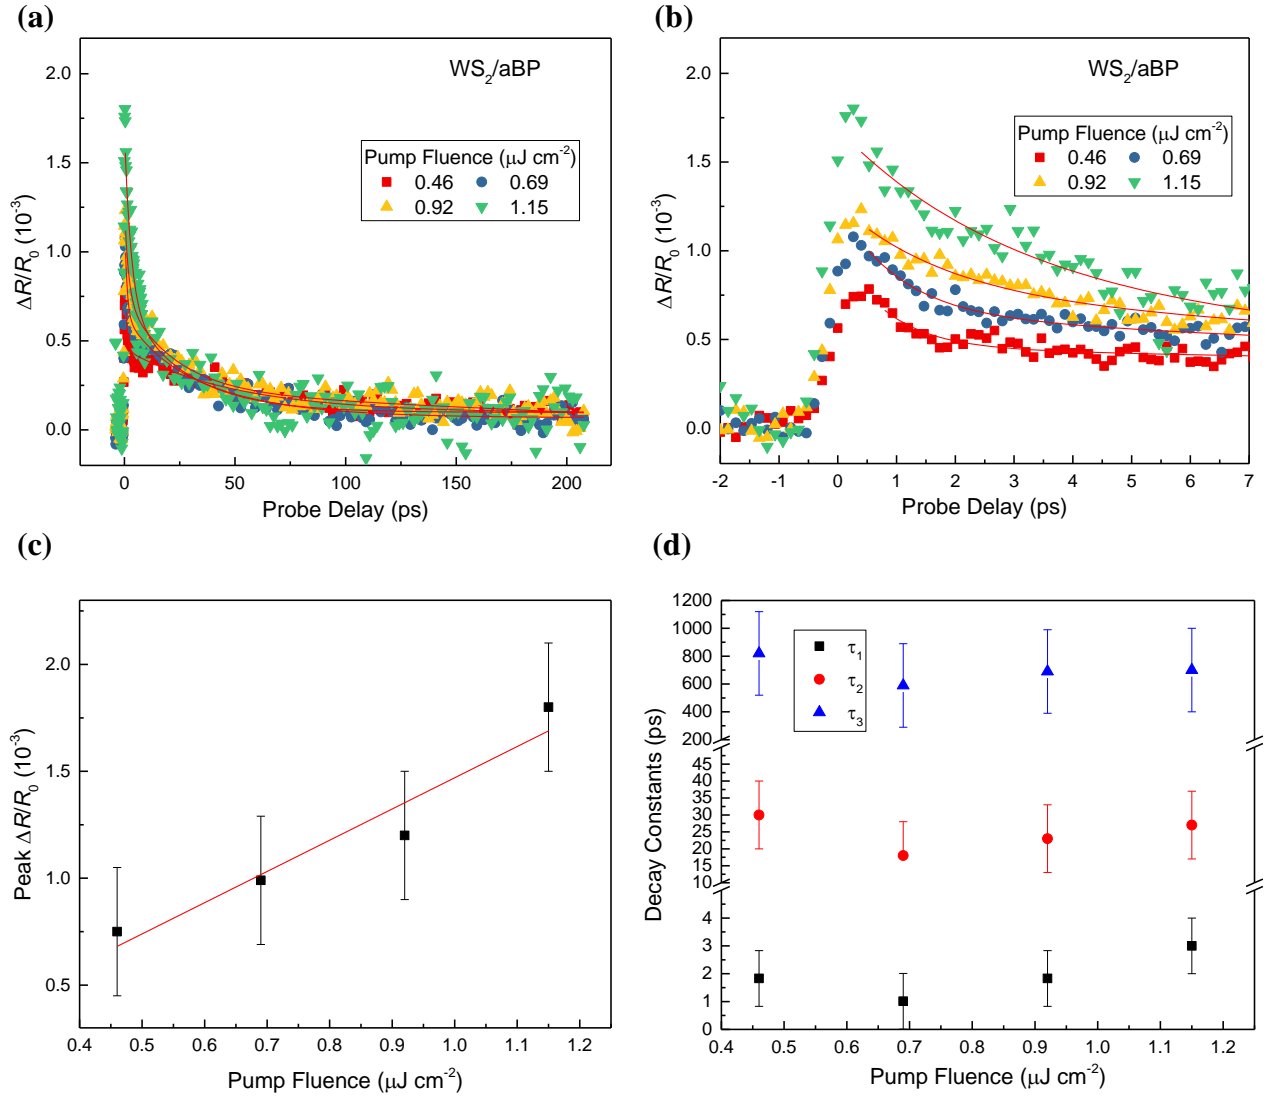

**Figure S2.** (a) Differential reflection signal of the WS<sub>2</sub>/aBP sample with different values of pump fluence as indicated in the legend. The red curves are double-exponential fits (see main text). (b) Same as (a) but with a smaller time range near zero probe delay. (c) Dependence of the peak signal on the pump fluence. The red line is a linear fit to the data. (d) The three time constants deduced from fits shown in (a) and (b) as a function of the pump fluence.
